# Supplementary material
Source: publisher site journal article supplement (https://www.degruyterbrill.com/publication/journal_key/PSYCH/downloadAsset/PSYCH_CFP%20Positive%C2%A0Economic%20Psychology.pdf)
Supplement: Supplementary file 1 [file PSYCH_CFP%20Positive%C2%A0Economic%20Psychology.pdf]

# POSITIVE ECONOMIC PSYCHOLOGY: EXPLORING THE INTERSECTION BETWEEN POSITIVE PSYCHOLOGY AND ECONOMIC PSYCHOLOGY

“Open Psychology” (<https://www.degruyter.com/journal/key/psych/html>) invites submissions for a special issue dedicated to Positive Economic Psychology, edited by Dr Rona Hart (School of Psychology, University of Sussex, UK).

## DESCRIPTION

This special issue is dedicated to exploring the emerging field of Positive Economic Psychology, a domain that marries insights from Positive Psychology with the complexities of economic behaviour, decisions, and perceptions. At its heart, Positive Economic Psychology is concerned with researching and enhancing economic wellbeing. It investigates the myriad conditions and processes that are instrumental in fostering economic prosperity and the optimal economic functioning of individuals, groups, and societies. The concept of economic wellbeing is pivotal, serving as the cornerstone for its research agenda and practical applications. By examining how positive psychological constructs such as happiness, resilience, hope, mindfulness and prosociality can influence economic decisions and outcomes, this interdisciplinary area seeks to uncover strategies that enhance financial wellbeing and contentment.

More information about the emerging discipline of Positive Economic Psychology and its current state may be found in the introductory article to this special issue, available at <https://www.degruyter.com/journal/key/psych/7/1/html>

Contributions to this special issue may span a broad array of empirical, theoretical, and methodological research, all aimed at advancing our understanding of how to integrate positive psychological principles to foster economic flourishing. Through such explorations, Positive Economic Psychology aims to chart a course towards more sustainable, ethical, and positive economic practices and policies.

The scope of the special issue encompasses a broad spectrum of topics and research areas that combine Positive Psychology and Economic Psychology. The scope includes, but is not limited to, the following areas:

- Exploration of key concepts (such as economic wellbeing, financial satisfaction, financial stress, and economic fragility);
- Dispositions and capabilities that impinge on economic behaviours (such as traits, states, skills, knowledge, and attitudes);
- Experiences, circumstances and contexts that influence economic behaviours (such as SES and global economic trends);

- Economic decisions, behaviours and actions (with particular emphasis on adaptive and productive behaviours);
- Policies and interventions aimed at fostering adaptive and effective financial decisions and behaviours;
- Economic outcomes (particularly those that contribute to an individual's overall quality of life).

Authors publishing their articles in the special issue will benefit from:

- transparent, comprehensive and fast peer review,
- no open access fees for authors without access to publishing funds at their institutions (to apply for the fee waiver please contact Managing Editor of the journal Katarzyna Tempczyk at [katarzyna.tempczyk@degruyterbrill.com](mailto:katarzyna.tempczyk@degruyterbrill.com) before submission)

## HOW TO SUBMIT

Manuscripts will be collected until April 30, 2026, via the on-line submission system at <https://www.editorialmanager.com/psych/default.aspx>

Contributions to this special issue will be published in vol. 2025 and vol. 2026. Evaluation process for each manuscript will be started immediately after its submission, and each article will be published immediately upon completing the process. Therefore we encourage all authors to submit their manuscripts as soon as possible, to speed up their publication.

Please choose: special issue Positive Economic Psychology.

Before submission the authors should carefully read the Instruction for Authors, available at [https://www.degruyter.com/publication/journal\\_key/PSYCH/downloadAsset/PSYCH\\_Instruction%20for%20Authors.pdf](https://www.degruyter.com/publication/journal_key/PSYCH/downloadAsset/PSYCH_Instruction%20for%20Authors.pdf)

All contributions will undergo critical peer-review before being accepted for publication.

Further questions about content for this thematic issue can be addressed to Dr Rona Hart ([rona.hart@Sussex.ac.uk](mailto:rona.hart@Sussex.ac.uk)). In case of technical problems with submission please write to [AssistantManagingEditor@degruyterbrill.com](mailto:AssistantManagingEditor@degruyterbrill.com).

Find us on Facebook: <https://www.facebook.com/DGOpenPsychology>.
